# Supplementary material
Source: publisher figshare collection journal article supplement (https://acs.figshare.com/ndownloader/files/5032252)
Supplement: Supplementary file 1 [file 5032252]

data_twin4
_audit_creation_date              2015-11-01
_audit_creation_method
;
Olex2 1.2-alpha
(compiled 2015.10.28 svn.r3245 for OlexSys, GUI svn.r5128)
;
_publ_contact_author_address      ?
_publ_contact_author_email        ?
_publ_contact_author_name         ''
_publ_contact_author_phone        ?
_publ_section_references
;
Dolomanov, O.V., Bourhis, L.J., Gildea, R.J, Howard, J.A.K. & Puschmann, H.
 (2009), J. Appl. Cryst. 42, 339-341.

Sheldrick, G.M. (2008). Acta Cryst. A64, 112-122.

Sheldrick, G.M. (2015). Acta Cryst. A71, 3-8.
;
_chemical_name_common             ?
_chemical_name_systematic         ?
_chemical_formula_moiety
'C31 H30 N4 O3 Ru, 2(C H2 Cl2), 0.5(C H4 O), 2(F3 P0.5)'
_chemical_formula_sum             'C33.50 H36 Cl4 F6 N4 O3.50 P Ru'
_chemical_formula_weight          938.50
_chemical_melting_point           ?
loop_
  _atom_type_symbol
  _atom_type_description
  _atom_type_scat_dispersion_real
  _atom_type_scat_dispersion_imag
  _atom_type_scat_source
 'C' 'C' 0.0181 0.0091 'International Tables Vol C Tables 4.2.6.8 and 6.1.1.4'
 'H' 'H' 0.0000 0.0000 'International Tables Vol C Tables 4.2.6.8 and 6.1.1.4'
 'Cl' 'Cl' 0.3639 0.7018 'International Tables Vol C Tables 4.2.6.8 and 6.1.1.4'
 'F' 'F' 0.0727 0.0534 'International Tables Vol C Tables 4.2.6.8 and 6.1.1.4'
 'N' 'N' 0.0311 0.0180 'International Tables Vol C Tables 4.2.6.8 and 6.1.1.4'
 'O' 'O' 0.0492 0.0322 'International Tables Vol C Tables 4.2.6.8 and 6.1.1.4'
 'P' 'P' 0.2955 0.4335 'International Tables Vol C Tables 4.2.6.8 and 6.1.1.4'
 'Ru' 'Ru' 0.0552 3.2960 'International Tables Vol C Tables 4.2.6.8 and 6.1.1.4'

_shelx_space_group_comment
;
The symmetry employed for this shelxl refinement is uniquely defined
by the following loop, which should always be used as a source of
symmetry information in preference to the above space-group names.
They are only intended as comments.
;
_space_group_crystal_system       'triclinic'
_space_group_IT_number            2
_space_group_name_H-M_alt         'P -1'
_space_group_name_Hall            '-P 1'
loop_
  _space_group_symop_operation_xyz
 'x, y, z'
 '-x, -y, -z'

_cell_length_a                    12.1017(4)
_cell_length_b                    12.7507(4)
_cell_length_c                    14.0794(5)
_cell_angle_alpha                 71.1540(10)
_cell_angle_beta                  82.2680(10)
_cell_angle_gamma                 71.9180(10)
_cell_volume                      1953.10(11)
_cell_formula_units_Z             2
_cell_measurement_reflns_used     9960
_cell_measurement_temperature     100
_cell_measurement_theta_max       67.05
_cell_measurement_theta_min       3.82
_shelx_estimated_absorpt_T_max    ?
_shelx_estimated_absorpt_T_min    ?
_exptl_absorpt_coefficient_mu     6.771
_exptl_absorpt_correction_T_max   0.752878
_exptl_absorpt_correction_T_min   0.556146
_exptl_absorpt_correction_type    multi-scan
_exptl_absorpt_process_details
;
 TWINABS-2012/1 (Bruker,2012) was used for absorption correction.
 
For component 1:
 wR2(int) was 0.0842 before and 0.0496 after correction.
 The Ratio of minimum to maximum transmission is 0.74.
 The \l/2 correction factor is Not present

Final HKLF 4 output contains 14245 reflections, Rint = 0.0307
 (11579 with I > 3sig(I), Rint = 0.0299)
;
_exptl_absorpt_special_details    ?
_exptl_crystal_colour             black
_exptl_crystal_colour_primary     black
_exptl_crystal_density_diffrn     1.596
_exptl_crystal_density_meas       ?
_exptl_crystal_density_method     ?
_exptl_crystal_description        block
_exptl_crystal_F_000              948
_exptl_crystal_size_max           0.2
_exptl_crystal_size_mid           0.2
_exptl_crystal_size_min           0.2
_exptl_transmission_factor_max    ?
_exptl_transmission_factor_min    ?
_diffrn_reflns_av_R_equivalents   ?
_diffrn_reflns_av_unetI/netI      0.0356
_diffrn_reflns_Laue_measured_fraction_full 0.976
_diffrn_reflns_Laue_measured_fraction_max 0.976
_diffrn_reflns_limit_h_max        14
_diffrn_reflns_limit_h_min        -14
_diffrn_reflns_limit_k_max        15
_diffrn_reflns_limit_k_min        -14
_diffrn_reflns_limit_l_max        16
_diffrn_reflns_limit_l_min        0
_diffrn_reflns_number             6908
_diffrn_reflns_point_group_measured_fraction_full 0.976
_diffrn_reflns_point_group_measured_fraction_max 0.976
_diffrn_reflns_theta_full         67.679
_diffrn_reflns_theta_max          67.684
_diffrn_reflns_theta_min          3.319
_diffrn_ambient_temperature       100
_diffrn_detector_area_resol_mean  ?
_diffrn_measured_fraction_theta_full 0.976
_diffrn_measured_fraction_theta_max 0.976
_diffrn_measurement_device_type   'Bruker APEX-II CCD'
_diffrn_measurement_method        '\f and \w scans'
_diffrn_radiation_type            CuK\a
_diffrn_radiation_wavelength      1.54178
_diffrn_source                    ?
_diffrn_standards_number          0
_reflns_Friedel_coverage          0.000
_reflns_Friedel_fraction_full     .
_reflns_Friedel_fraction_max      .
_reflns_number_gt                 6736
_reflns_number_total              6908
_reflns_special_details
;
 _reflns_Friedel_fraction is defined as the number of unique
 Friedel pairs measured divided by the number that would be
 possible theoretically, ignoring centric projections and
 systematic absences.
;
_reflns_threshold_expression      'I > 2\s(I)'
_computing_cell_refinement        ?
_computing_data_collection        ?
_computing_data_reduction         ?
_computing_molecular_graphics     'Olex2 (Dolomanov et al., 2009)'
_computing_publication_material   'Olex2 (Dolomanov et al., 2009)'
_computing_structure_refinement   'XL (Sheldrick, 2008)'
_computing_structure_solution     'XT (Sheldrick, 2015)'
_refine_diff_density_max          2.057
_refine_diff_density_min          -2.171
_refine_diff_density_rms          0.168
_refine_ls_extinction_coef        .
_refine_ls_extinction_method      none
_refine_ls_goodness_of_fit_ref    1.085
_refine_ls_hydrogen_treatment     constr
_refine_ls_matrix_type            full
_refine_ls_number_parameters      481
_refine_ls_number_reflns          6908
_refine_ls_number_restraints      1
_refine_ls_R_factor_all           0.0753
_refine_ls_R_factor_gt            0.0740
_refine_ls_restrained_S_all       1.085
_refine_ls_shift/su_max           0.000
_refine_ls_shift/su_mean          0.000
_refine_ls_structure_factor_coef  Fsqd
_refine_ls_weighting_details
'w=1/[\s^2^(Fo^2^)+(0.1139P)^2^+11.9926P] where P=(Fo^2^+2Fc^2^)/3'
_refine_ls_weighting_scheme       calc
_refine_ls_wR_factor_gt           0.2049
_refine_ls_wR_factor_ref          0.2063
_refine_special_details
;
 Refined as a 2-component twin.
;
_olex2_refinement_description
;
1. Twinned data refinement
 Scales: 0.941(4) 0.059(4)
2. Fixed Uiso
 At 1.2 times of:
  All C(H) groups, All C(H,H) groups, All N(H) groups
 At 1.5 times of:
  All C(H,H,H) groups, All O(H) groups
3. Restrained distances
 O4-C34
 1.42 with sigma of 0.02
4. Uiso/Uaniso restraints and constraints
Uiso(O4) = Uiso(C34)
5. Others
 Fixed Sof: O4(0.5) H4A(0.5) C34(0.5) H34A(0.5) H34B(0.5) H34C(0.5)
6.a Ternary CH refined with riding coordinates:
 C8(H8), C13(H13)
6.b Secondary CH2 refined with riding coordinates:
 C9(H9A,H9B), C10(H10A,H10B), C11(H11A,H11B), C12(H12A,H12B), C33(H33A,H33B),
 C32(H32A,H32B)
6.c Aromatic/amide H refined with riding coordinates:
 N3(H3), C2(H2), C3(H3A), C4(H4), C5(H5), C7(H7), C14(H14), C16(H16), C17(H17),
  C18(H18), C19(H19), C21(H21), C22(H22), C23(H23), C24(H24), C25(H25),
 C27(H27), C28(H28), C30(H30), C31(H31)
6.d Tetrahedral OH refined with riding coordinates:
 O4(H4A)
6.e Idealised Me refined as rotating group:
 C34(H34A,H34B,H34C)
;
_atom_sites_solution_hydrogens    geom
_atom_sites_solution_primary      ?
_atom_sites_solution_secondary    ?
loop_
  _atom_site_label
  _atom_site_type_symbol
  _atom_site_fract_x
  _atom_site_fract_y
  _atom_site_fract_z
  _atom_site_U_iso_or_equiv
  _atom_site_adp_type
  _atom_site_occupancy
  _atom_site_site_symmetry_order
  _atom_site_calc_flag
  _atom_site_refinement_flags_posn
  _atom_site_refinement_flags_adp
  _atom_site_refinement_flags_occupancy
  _atom_site_disorder_assembly
  _atom_site_disorder_group
 Ru1 Ru 0.48250(3) 0.76376(4) 0.77570(3) 0.02278(18) Uani 1 1 d . . . . .
 O1 O 0.3779(4) 0.9170(4) 0.7045(3) 0.0372(10) Uani 1 1 d . . . . .
 O2 O 0.3941(3) 0.7450(4) 0.9086(3) 0.0279(9) Uani 1 1 d . . . . .
 O3 O -0.0789(4) 0.7663(6) 0.7255(4) 0.0578(16) Uani 1 1 d . . . . .
 N1 N 0.5793(4) 0.7558(5) 0.6485(4) 0.0333(12) Uani 1 1 d . . . . .
 N2 N 0.6052(4) 0.6154(4) 0.8334(4) 0.0275(10) Uani 1 1 d . . . . .
 N3 N 0.3842(4) 0.6890(5) 0.7275(4) 0.0286(10) Uani 1 1 d . . . . .
 H3 H 0.4242 0.6351 0.6998 0.034 Uiso 1 1 calc R . . . .
 N4 N 0.5717(4) 0.8542(4) 0.8263(4) 0.0273(10) Uani 1 1 d . . . . .
 C1 C 0.3547(6) 0.9445(7) 0.6088(5) 0.0444(18) Uani 1 1 d . . . . .
 C2 C 0.2510(7) 1.0319(8) 0.5752(7) 0.059(2) Uani 1 1 d . . . . .
 H2 H 0.2013 1.0675 0.6212 0.071 Uiso 1 1 calc R . . . .
 C3 C 0.2211(9) 1.0662(9) 0.4767(9) 0.081(4) Uani 1 1 d . . . . .
 H3A H 0.1502 1.1242 0.4560 0.097 Uiso 1 1 calc R . . . .
 C4 C 0.2926(10) 1.0177(10) 0.4070(7) 0.080(4) Uani 1 1 d . . . . .
 H4 H 0.2705 1.0415 0.3394 0.096 Uiso 1 1 calc R . . . .
 C5 C 0.3944(8) 0.9359(10) 0.4364(6) 0.066(3) Uani 1 1 d . . . . .
 H5 H 0.4445 0.9054 0.3877 0.079 Uiso 1 1 calc R . . . .
 C6 C 0.4286(7) 0.8942(8) 0.5377(5) 0.0467(19) Uani 1 1 d . . . . .
 C7 C 0.5395(6) 0.8109(7) 0.5594(5) 0.0441(18) Uani 1 1 d . . . . .
 H7 H 0.5881 0.7945 0.5041 0.053 Uiso 1 1 calc R . . . .
 C8 C 0.6944(5) 0.6696(6) 0.6669(5) 0.0352(14) Uani 1 1 d . . . . .
 H8 H 0.7458 0.7041 0.6899 0.042 Uiso 1 1 calc R . . . .
 C9 C 0.7561(6) 0.6303(8) 0.5772(6) 0.052(2) Uani 1 1 d . . . . .
 H9A H 0.7052 0.5999 0.5502 0.062 Uiso 1 1 calc R . . . .
 H9B H 0.7721 0.6970 0.5235 0.062 Uiso 1 1 calc R . . . .
 C10 C 0.8688(7) 0.5377(10) 0.6081(8) 0.071(3) Uani 1 1 d . . . . .
 H10A H 0.9228 0.5715 0.6271 0.085 Uiso 1 1 calc R . . . .
 H10B H 0.9049 0.5096 0.5502 0.085 Uiso 1 1 calc R . . . .
 C11 C 0.8515(7) 0.4367(8) 0.6955(9) 0.067(3) Uani 1 1 d . . . . .
 H11A H 0.9280 0.3798 0.7149 0.080 Uiso 1 1 calc R . . . .
 H11B H 0.8036 0.3981 0.6748 0.080 Uiso 1 1 calc R . . . .
 C12 C 0.7920(6) 0.4765(7) 0.7854(7) 0.0485(19) Uani 1 1 d . . . . .
 H12A H 0.7788 0.4097 0.8408 0.058 Uiso 1 1 calc R . . . .
 H12B H 0.8422 0.5102 0.8095 0.058 Uiso 1 1 calc R . . . .
 C13 C 0.6765(5) 0.5664(6) 0.7544(5) 0.0341(14) Uani 1 1 d . . . . .
 H13 H 0.6287 0.5296 0.7299 0.041 Uiso 1 1 calc R . . . .
 C14 C 0.6269(5) 0.5714(5) 0.9275(5) 0.0320(13) Uani 1 1 d . . . . .
 H14 H 0.6914 0.5046 0.9466 0.038 Uiso 1 1 calc R . . . .
 C15 C 0.5608(6) 0.6161(5) 1.0053(4) 0.0311(13) Uani 1 1 d . . . . .
 C16 C 0.6102(7) 0.5733(7) 1.1000(5) 0.0478(18) Uani 1 1 d . . . . .
 H16 H 0.6856 0.5198 1.1082 0.057 Uiso 1 1 calc R . . . .
 C17 C 0.5524(8) 0.6067(8) 1.1814(5) 0.058(2) Uani 1 1 d . . . . .
 H17 H 0.5887 0.5791 1.2440 0.070 Uiso 1 1 calc R . . . .
 C18 C 0.4404(8) 0.6813(8) 1.1705(5) 0.054(2) Uani 1 1 d . . . . .
 H18 H 0.3991 0.7025 1.2270 0.064 Uiso 1 1 calc R . . . .
 C19 C 0.3883(6) 0.7251(6) 1.0794(5) 0.0368(14) Uani 1 1 d . . . . .
 H19 H 0.3110 0.7749 1.0742 0.044 Uiso 1 1 calc R . . . .
 C20 C 0.4480(5) 0.6972(5) 0.9936(4) 0.0284(12) Uani 1 1 d . . . . .
 C21 C 0.6822(5) 0.8147(6) 0.8541(5) 0.0310(13) Uani 1 1 d . . . . .
 H21 H 0.7291 0.7432 0.8451 0.037 Uiso 1 1 calc R . . . .
 C22 C 0.7303(6) 0.8742(7) 0.8954(5) 0.0393(15) Uani 1 1 d . . . . .
 H22 H 0.8091 0.8434 0.9142 0.047 Uiso 1 1 calc R . . . .
 C23 C 0.6650(8) 0.9774(7) 0.9092(6) 0.0497(19) Uani 1 1 d . . . . .
 H23 H 0.6967 1.0187 0.9385 0.060 Uiso 1 1 calc R . . . .
 C24 C 0.5506(7) 1.0196(7) 0.8790(6) 0.0479(18) Uani 1 1 d . . . . .
 H24 H 0.5032 1.0919 0.8859 0.057 Uiso 1 1 calc R . . . .
 C25 C 0.5062(6) 0.9561(6) 0.8390(5) 0.0352(14) Uani 1 1 d . . . . .
 H25 H 0.4275 0.9849 0.8198 0.042 Uiso 1 1 calc R . . . .
 C26 C 0.2720(5) 0.7073(6) 0.7305(4) 0.0309(13) Uani 1 1 d . . . . .
 C27 C 0.1923(5) 0.7833(6) 0.7836(5) 0.0356(14) Uani 1 1 d . . . . .
 H27 H 0.2220 0.8204 0.8188 0.043 Uiso 1 1 calc R . . . .
 C28 C 0.0773(6) 0.8010(7) 0.7829(6) 0.0466(18) Uani 1 1 d . . . . .
 H28 H 0.0267 0.8506 0.8182 0.056 Uiso 1 1 calc R . . . .
 C29 C 0.0275(5) 0.7465(7) 0.7296(5) 0.0454(19) Uani 1 1 d . . . . .
 C30 C 0.1080(7) 0.6692(9) 0.6791(6) 0.056(2) Uani 1 1 d . . . . .
 H30 H 0.0782 0.6307 0.6454 0.068 Uiso 1 1 calc R . . . .
 C31 C 0.2240(6) 0.6504(8) 0.6786(6) 0.0470(18) Uani 1 1 d . . . . .
 H31 H 0.2745 0.5998 0.6443 0.056 Uiso 1 1 calc R . . . .
 Cl3 Cl 0.1986(4) 1.3504(6) 0.6905(3) 0.1451(19) Uani 1 1 d . . . . .
 Cl4 Cl 0.1983(7) 1.1424(5) 0.8471(5) 0.189(3) Uani 1 1 d . . . . .
 C33 C 0.1770(13) 1.2856(14) 0.8215(11) 0.104(5) Uani 1 1 d . . . . .
 H33A H 0.2318 1.2991 0.8594 0.125 Uiso 1 1 calc R . . . .
 H33B H 0.0968 1.3217 0.8431 0.125 Uiso 1 1 calc R . . . .
 O4 O 0.079(2) 0.928(2) 1.003(2) 0.140(7) Uiso 0.5 1 d D . . A -1
 H4A H 0.1209 0.9279 0.9504 0.211 Uiso 0.5 1 calc R . . A -1
 C34 C 0.043(3) 0.829(3) 1.036(3) 0.140(7) Uiso 0.5 1 d D . . A -1
 H34A H 0.0353 0.8058 0.9780 0.211 Uiso 0.5 1 calc GR . . A -1
 H34B H -0.0317 0.8444 1.0726 0.211 Uiso 0.5 1 calc GR . . A -1
 H34C H 0.1011 0.7671 1.0803 0.211 Uiso 0.5 1 calc GR . . A -1
 P2 P 0.5000 0.5000 0.5000 0.0423(6) Uani 1 2 d S T P . .
 F4 F 0.5029(5) 0.5547(6) 0.5861(4) 0.0789(19) Uani 1 1 d . . . . .
 F5 F 0.5622(13) 0.5816(11) 0.4282(5) 0.182(6) Uani 1 1 d . . . . .
 F6 F 0.6223(9) 0.4245(14) 0.5252(12) 0.213(8) Uani 1 1 d . . . . .
 Cl0A Cl 0.0283(4) 0.7617(4) 0.4364(3) 0.1224(13) Uani 1 1 d . . . . .
 Cl1A Cl 0.1580(6) 0.8786(4) 0.2717(4) 0.168(2) Uani 1 1 d . . . . .
 C32 C 0.1435(15) 0.8177(14) 0.4090(12) 0.114(5) Uani 1 1 d . . . . .
 H32A H 0.2155 0.7563 0.4345 0.137 Uiso 1 1 calc R . . . .
 H32B H 0.1310 0.8788 0.4415 0.137 Uiso 1 1 calc R . . . .
 P1 P 1.0000 0.5000 1.0000 0.0439(6) Uani 1 2 d S T P . .
 F1 F 0.8818(5) 0.5958(6) 0.9667(5) 0.095(2) Uani 1 1 d . . . . .
 F2 F 1.0366(5) 0.5134(6) 0.8852(4) 0.0804(17) Uani 1 1 d . . . . .
 F3 F 1.0544(8) 0.5985(7) 0.9990(5) 0.107(3) Uani 1 1 d . . . . .

loop_
  _atom_site_aniso_label
  _atom_site_aniso_U_11
  _atom_site_aniso_U_22
  _atom_site_aniso_U_33
  _atom_site_aniso_U_23
  _atom_site_aniso_U_13
  _atom_site_aniso_U_12
 Ru1 0.0188(3) 0.0324(3) 0.0192(3) -0.00578(18) -0.00143(16) -0.01175(18)
 O1 0.034(2) 0.047(3) 0.028(2) 0.000(2) -0.0072(18) -0.018(2)
 O2 0.026(2) 0.034(2) 0.024(2) -0.0071(17) -0.0007(16) -0.0111(17)
 O3 0.021(2) 0.084(4) 0.048(3) 0.015(3) -0.011(2) -0.021(2)
 N1 0.029(3) 0.058(3) 0.026(3) -0.016(2) 0.002(2) -0.027(2)
 N2 0.020(2) 0.040(3) 0.032(3) -0.014(2) -0.0016(19) -0.017(2)
 N3 0.022(2) 0.043(3) 0.023(2) -0.008(2) 0.0007(18) -0.015(2)
 N4 0.034(3) 0.032(3) 0.019(2) -0.005(2) 0.0011(19) -0.019(2)
 C1 0.039(4) 0.055(4) 0.034(4) 0.015(3) -0.012(3) -0.031(3)
 C2 0.046(4) 0.059(5) 0.055(5) 0.023(4) -0.019(4) -0.026(4)
 C3 0.065(6) 0.079(7) 0.075(7) 0.049(6) -0.046(6) -0.047(5)
 C4 0.085(7) 0.109(8) 0.039(5) 0.036(5) -0.031(5) -0.067(7)
 C5 0.067(6) 0.110(8) 0.030(4) 0.009(4) -0.011(4) -0.065(6)
 C6 0.044(4) 0.075(5) 0.024(3) 0.008(3) -0.009(3) -0.043(4)
 C7 0.045(4) 0.078(5) 0.027(3) -0.016(3) 0.005(3) -0.045(4)
 C8 0.021(3) 0.060(4) 0.041(4) -0.028(3) 0.005(2) -0.023(3)
 C9 0.038(4) 0.092(6) 0.054(5) -0.048(5) 0.019(3) -0.039(4)
 C10 0.034(4) 0.111(8) 0.109(8) -0.083(7) 0.034(5) -0.041(5)
 C11 0.028(4) 0.072(6) 0.121(9) -0.061(6) 0.011(4) -0.015(4)
 C12 0.023(3) 0.048(4) 0.085(6) -0.036(4) 0.001(3) -0.010(3)
 C13 0.021(3) 0.045(4) 0.050(4) -0.026(3) 0.002(3) -0.016(3)
 C14 0.025(3) 0.032(3) 0.040(4) -0.005(3) -0.006(3) -0.012(2)
 C15 0.036(3) 0.033(3) 0.023(3) 0.003(2) -0.006(2) -0.019(3)
 C16 0.052(4) 0.059(5) 0.030(4) 0.004(3) -0.014(3) -0.025(4)
 C17 0.073(6) 0.080(6) 0.024(4) 0.002(4) -0.012(4) -0.041(5)
 C18 0.083(6) 0.068(5) 0.026(3) -0.015(3) 0.010(4) -0.047(5)
 C19 0.052(4) 0.039(3) 0.026(3) -0.009(3) 0.008(3) -0.027(3)
 C20 0.039(3) 0.030(3) 0.022(3) -0.005(2) -0.001(2) -0.022(3)
 C21 0.032(3) 0.039(3) 0.029(3) -0.010(3) 0.004(2) -0.022(3)
 C22 0.041(4) 0.058(4) 0.031(3) -0.014(3) 0.002(3) -0.031(3)
 C23 0.069(5) 0.059(5) 0.043(4) -0.026(4) 0.004(4) -0.039(4)
 C24 0.061(5) 0.043(4) 0.048(4) -0.021(3) 0.006(4) -0.021(4)
 C25 0.042(4) 0.035(3) 0.029(3) -0.009(3) 0.002(3) -0.014(3)
 C26 0.023(3) 0.047(4) 0.023(3) 0.000(3) -0.003(2) -0.019(3)
 C27 0.024(3) 0.045(4) 0.035(3) -0.005(3) -0.002(2) -0.012(3)
 C28 0.024(3) 0.056(4) 0.045(4) -0.001(3) -0.002(3) -0.007(3)
 C29 0.023(3) 0.066(5) 0.034(4) 0.014(3) -0.007(3) -0.022(3)
 C30 0.032(4) 0.097(7) 0.051(5) -0.020(5) -0.003(3) -0.036(4)
 C31 0.028(3) 0.082(6) 0.045(4) -0.026(4) 0.001(3) -0.029(4)
 Cl3 0.136(3) 0.238(6) 0.110(3) -0.090(4) 0.042(3) -0.101(4)
 Cl4 0.247(7) 0.146(4) 0.156(5) -0.059(4) -0.066(5) 0.008(5)
 C33 0.091(9) 0.146(13) 0.094(9) -0.068(10) -0.002(7) -0.027(9)
 P2 0.0410(13) 0.0838(19) 0.0271(11) -0.0340(12) 0.0127(10) -0.0401(13)
 F4 0.068(3) 0.155(6) 0.072(3) -0.087(4) 0.033(3) -0.072(4)
 F5 0.353(16) 0.263(12) 0.052(4) -0.062(6) 0.052(6) -0.269(13)
 F6 0.112(7) 0.298(16) 0.270(15) -0.227(15) -0.098(9) 0.071(9)
 Cl0A 0.117(3) 0.145(4) 0.118(3) -0.054(3) 0.019(2) -0.050(3)
 Cl1A 0.249(6) 0.100(3) 0.122(3) -0.012(2) 0.075(4) -0.062(3)
 C32 0.141(13) 0.097(10) 0.121(12) -0.019(9) -0.014(10) -0.067(10)
 P1 0.0273(12) 0.0564(16) 0.0333(13) 0.0120(11) -0.0078(9) -0.0153(11)
 F1 0.055(3) 0.111(5) 0.079(4) -0.004(4) -0.026(3) 0.016(3)
 F2 0.082(4) 0.093(4) 0.040(3) 0.008(3) 0.003(3) -0.020(3)
 F3 0.152(7) 0.112(5) 0.074(4) 0.017(4) -0.032(4) -0.096(5)

_geom_special_details
;
 All esds (except the esd in the dihedral angle between two l.s. planes)
 are estimated using the full covariance matrix.  The cell esds are taken
 into account individually in the estimation of esds in distances, angles
 and torsion angles; correlations between esds in cell parameters are only
 used when they are defined by crystal symmetry.  An approximate (isotropic)
 treatment of cell esds is used for estimating esds involving l.s. planes.
;
loop_
  _geom_bond_atom_site_label_1
  _geom_bond_atom_site_label_2
  _geom_bond_distance
  _geom_bond_site_symmetry_2
  _geom_bond_publ_flag
 Ru1 O1 1.991(5) . ?
 Ru1 O2 2.008(4) . ?
 Ru1 N1 2.017(5) . ?
 Ru1 N2 2.008(5) . ?
 Ru1 N3 2.031(5) . ?
 Ru1 N4 2.125(5) . ?
 O1 C1 1.325(8) . ?
 O2 C20 1.312(7) . ?
 O3 C29 1.239(8) . ?
 N1 C7 1.297(9) . ?
 N1 C8 1.476(9) . ?
 N2 C13 1.493(8) . ?
 N2 C14 1.289(8) . ?
 N3 H3 0.8800 . ?
 N3 C26 1.301(8) . ?
 N4 C21 1.338(8) . ?
 N4 C25 1.349(8) . ?
 C1 C2 1.411(11) . ?
 C1 C6 1.424(12) . ?
 C2 H2 0.9500 . ?
 C2 C3 1.375(14) . ?
 C3 H3A 0.9500 . ?
 C3 C4 1.388(18) . ?
 C4 H4 0.9500 . ?
 C4 C5 1.355(16) . ?
 C5 H5 0.9500 . ?
 C5 C6 1.422(10) . ?
 C6 C7 1.428(12) . ?
 C7 H7 0.9500 . ?
 C8 H8 1.0000 . ?
 C8 C9 1.525(9) . ?
 C8 C13 1.534(10) . ?
 C9 H9A 0.9900 . ?
 C9 H9B 0.9900 . ?
 C9 C10 1.507(13) . ?
 C10 H10A 0.9900 . ?
 C10 H10B 0.9900 . ?
 C10 C11 1.513(16) . ?
 C11 H11A 0.9900 . ?
 C11 H11B 0.9900 . ?
 C11 C12 1.523(12) . ?
 C12 H12A 0.9900 . ?
 C12 H12B 0.9900 . ?
 C12 C13 1.518(9) . ?
 C13 H13 1.0000 . ?
 C14 H14 0.9500 . ?
 C14 C15 1.431(9) . ?
 C15 C16 1.406(9) . ?
 C15 C20 1.426(9) . ?
 C16 H16 0.9500 . ?
 C16 C17 1.377(12) . ?
 C17 H17 0.9500 . ?
 C17 C18 1.388(13) . ?
 C18 H18 0.9500 . ?
 C18 C19 1.376(11) . ?
 C19 H19 0.9500 . ?
 C19 C20 1.411(9) . ?
 C21 H21 0.9500 . ?
 C21 C22 1.379(9) . ?
 C22 H22 0.9500 . ?
 C22 C23 1.369(11) . ?
 C23 H23 0.9500 . ?
 C23 C24 1.390(12) . ?
 C24 H24 0.9500 . ?
 C24 C25 1.382(10) . ?
 C25 H25 0.9500 . ?
 C26 C27 1.457(10) . ?
 C26 C31 1.455(9) . ?
 C27 H27 0.9500 . ?
 C27 C28 1.340(9) . ?
 C28 H28 0.9500 . ?
 C28 C29 1.458(12) . ?
 C29 C30 1.448(12) . ?
 C30 H30 0.9500 . ?
 C30 C31 1.348(10) . ?
 C31 H31 0.9500 . ?
 Cl3 C33 1.781(15) . ?
 Cl4 C33 1.685(17) . ?
 C33 H33A 0.9900 . ?
 C33 H33B 0.9900 . ?
 O4 H4A 0.8400 . ?
 O4 C34 1.374(18) . ?
 C34 H34A 0.9800 . ?
 C34 H34B 0.9800 . ?
 C34 H34C 0.9800 . ?
 P2 F4 1.590(4) 2_666 ?
 P2 F4 1.590(4) . ?
 P2 F5 1.508(7) . ?
 P2 F5 1.508(7) 2_666 ?
 P2 F6 1.510(9) 2_666 ?
 P2 F6 1.510(9) . ?
 Cl0A C32 1.702(15) . ?
 Cl1A C32 1.842(17) . ?
 C32 H32A 0.9900 . ?
 C32 H32B 0.9900 . ?
 P1 F1 1.576(5) 2_767 ?
 P1 F1 1.576(5) . ?
 P1 F2 1.585(5) 2_767 ?
 P1 F2 1.585(5) . ?
 P1 F3 1.584(6) 2_767 ?
 P1 F3 1.584(6) . ?

loop_
  _geom_angle_atom_site_label_1
  _geom_angle_atom_site_label_2
  _geom_angle_atom_site_label_3
  _geom_angle
  _geom_angle_site_symmetry_1
  _geom_angle_site_symmetry_3
  _geom_angle_publ_flag
 O1 Ru1 O2 96.59(18) . . ?
 O1 Ru1 N1 91.2(2) . . ?
 O1 Ru1 N2 172.02(19) . . ?
 O1 Ru1 N3 88.1(2) . . ?
 O1 Ru1 N4 87.47(19) . . ?
 O2 Ru1 N1 171.2(2) . . ?
 O2 Ru1 N3 91.28(18) . . ?
 O2 Ru1 N4 86.61(17) . . ?
 N1 Ru1 N3 84.89(19) . . ?
 N1 Ru1 N4 97.83(19) . . ?
 N2 Ru1 O2 90.68(18) . . ?
 N2 Ru1 N1 81.8(2) . . ?
 N2 Ru1 N3 95.0(2) . . ?
 N2 Ru1 N4 89.67(19) . . ?
 N3 Ru1 N4 174.88(19) . . ?
 C1 O1 Ru1 121.7(5) . . ?
 C20 O2 Ru1 121.4(4) . . ?
 C7 N1 Ru1 123.3(5) . . ?
 C7 N1 C8 123.2(6) . . ?
 C8 N1 Ru1 113.1(4) . . ?
 C13 N2 Ru1 112.6(4) . . ?
 C14 N2 Ru1 124.1(4) . . ?
 C14 N2 C13 123.1(5) . . ?
 Ru1 N3 H3 114.5 . . ?
 C26 N3 Ru1 130.9(5) . . ?
 C26 N3 H3 114.5 . . ?
 C21 N4 Ru1 125.8(4) . . ?
 C21 N4 C25 118.4(5) . . ?
 C25 N4 Ru1 115.6(4) . . ?
 O1 C1 C2 117.1(8) . . ?
 O1 C1 C6 124.4(7) . . ?
 C2 C1 C6 118.4(7) . . ?
 C1 C2 H2 119.6 . . ?
 C3 C2 C1 120.7(10) . . ?
 C3 C2 H2 119.6 . . ?
 C2 C3 H3A 119.4 . . ?
 C2 C3 C4 121.2(10) . . ?
 C4 C3 H3A 119.4 . . ?
 C3 C4 H4 120.3 . . ?
 C5 C4 C3 119.4(8) . . ?
 C5 C4 H4 120.3 . . ?
 C4 C5 H5 118.9 . . ?
 C4 C5 C6 122.1(10) . . ?
 C6 C5 H5 118.9 . . ?
 C1 C6 C7 124.4(6) . . ?
 C5 C6 C1 118.1(8) . . ?
 C5 C6 C7 117.3(8) . . ?
 N1 C7 C6 125.3(7) . . ?
 N1 C7 H7 117.3 . . ?
 C6 C7 H7 117.3 . . ?
 N1 C8 H8 107.7 . . ?
 N1 C8 C9 116.0(6) . . ?
 N1 C8 C13 106.5(5) . . ?
 C9 C8 H8 107.7 . . ?
 C9 C8 C13 110.8(6) . . ?
 C13 C8 H8 107.7 . . ?
 C8 C9 H9A 109.6 . . ?
 C8 C9 H9B 109.6 . . ?
 H9A C9 H9B 108.1 . . ?
 C10 C9 C8 110.3(7) . . ?
 C10 C9 H9A 109.6 . . ?
 C10 C9 H9B 109.6 . . ?
 C9 C10 H10A 109.1 . . ?
 C9 C10 H10B 109.1 . . ?
 C9 C10 C11 112.3(6) . . ?
 H10A C10 H10B 107.9 . . ?
 C11 C10 H10A 109.1 . . ?
 C11 C10 H10B 109.1 . . ?
 C10 C11 H11A 109.4 . . ?
 C10 C11 H11B 109.4 . . ?
 C10 C11 C12 111.1(7) . . ?
 H11A C11 H11B 108.0 . . ?
 C12 C11 H11A 109.4 . . ?
 C12 C11 H11B 109.4 . . ?
 C11 C12 H12A 109.8 . . ?
 C11 C12 H12B 109.8 . . ?
 H12A C12 H12B 108.3 . . ?
 C13 C12 C11 109.2(7) . . ?
 C13 C12 H12A 109.8 . . ?
 C13 C12 H12B 109.8 . . ?
 N2 C13 C8 106.4(5) . . ?
 N2 C13 C12 116.9(6) . . ?
 N2 C13 H13 107.5 . . ?
 C8 C13 H13 107.5 . . ?
 C12 C13 C8 110.8(5) . . ?
 C12 C13 H13 107.5 . . ?
 N2 C14 H14 117.7 . . ?
 N2 C14 C15 124.6(6) . . ?
 C15 C14 H14 117.7 . . ?
 C16 C15 C14 116.9(6) . . ?
 C16 C15 C20 118.6(6) . . ?
 C20 C15 C14 124.5(5) . . ?
 C15 C16 H16 119.0 . . ?
 C17 C16 C15 121.9(8) . . ?
 C17 C16 H16 119.0 . . ?
 C16 C17 H17 120.5 . . ?
 C16 C17 C18 119.0(7) . . ?
 C18 C17 H17 120.5 . . ?
 C17 C18 H18 119.4 . . ?
 C19 C18 C17 121.1(7) . . ?
 C19 C18 H18 119.4 . . ?
 C18 C19 H19 119.6 . . ?
 C18 C19 C20 120.9(7) . . ?
 C20 C19 H19 119.6 . . ?
 O2 C20 C15 124.2(5) . . ?
 O2 C20 C19 117.5(6) . . ?
 C19 C20 C15 118.3(6) . . ?
 N4 C21 H21 118.9 . . ?
 N4 C21 C22 122.2(6) . . ?
 C22 C21 H21 118.9 . . ?
 C21 C22 H22 119.9 . . ?
 C23 C22 C21 120.3(7) . . ?
 C23 C22 H22 119.9 . . ?
 C22 C23 H23 121.2 . . ?
 C22 C23 C24 117.7(6) . . ?
 C24 C23 H23 121.2 . . ?
 C23 C24 H24 120.1 . . ?
 C25 C24 C23 119.8(7) . . ?
 C25 C24 H24 120.1 . . ?
 N4 C25 C24 121.7(7) . . ?
 N4 C25 H25 119.2 . . ?
 C24 C25 H25 119.2 . . ?
 N3 C26 C27 122.4(6) . . ?
 N3 C26 C31 119.0(6) . . ?
 C31 C26 C27 118.6(6) . . ?
 C26 C27 H27 119.9 . . ?
 C28 C27 C26 120.2(7) . . ?
 C28 C27 H27 119.9 . . ?
 C27 C28 H28 119.0 . . ?
 C27 C28 C29 122.0(7) . . ?
 C29 C28 H28 119.0 . . ?
 O3 C29 C28 122.2(8) . . ?
 O3 C29 C30 120.6(8) . . ?
 C30 C29 C28 117.2(6) . . ?
 C29 C30 H30 119.1 . . ?
 C31 C30 C29 121.8(8) . . ?
 C31 C30 H30 119.1 . . ?
 C26 C31 H31 119.9 . . ?
 C30 C31 C26 120.3(8) . . ?
 C30 C31 H31 119.9 . . ?
 Cl3 C33 H33A 109.5 . . ?
 Cl3 C33 H33B 109.5 . . ?
 Cl4 C33 Cl3 110.6(8) . . ?
 Cl4 C33 H33A 109.5 . . ?
 Cl4 C33 H33B 109.5 . . ?
 H33A C33 H33B 108.1 . . ?
 C34 O4 H4A 109.5 . . ?
 O4 C34 H34A 109.5 . . ?
 O4 C34 H34B 109.5 . . ?
 O4 C34 H34C 109.5 . . ?
 H34A C34 H34B 109.5 . . ?
 H34A C34 H34C 109.5 . . ?
 H34B C34 H34C 109.5 . . ?
 F4 P2 F4 180.0 2_666 . ?
 F5 P2 F4 90.0(3) 2_666 . ?
 F5 P2 F4 90.0(3) 2_666 2_666 ?
 F5 P2 F4 90.0(3) . 2_666 ?
 F5 P2 F4 90.0(3) . . ?
 F5 P2 F5 180.0 . 2_666 ?
 F5 P2 F6 96.9(9) . 2_666 ?
 F5 P2 F6 96.9(9) 2_666 . ?
 F5 P2 F6 83.1(9) 2_666 2_666 ?
 F5 P2 F6 83.1(9) . . ?
 F6 P2 F4 91.6(4) . 2_666 ?
 F6 P2 F4 88.4(4) 2_666 2_666 ?
 F6 P2 F4 88.4(4) . . ?
 F6 P2 F4 91.6(4) 2_666 . ?
 F6 P2 F6 180.0 2_666 . ?
 Cl0A C32 Cl1A 108.7(9) . . ?
 Cl0A C32 H32A 109.9 . . ?
 Cl0A C32 H32B 109.9 . . ?
 Cl1A C32 H32A 109.9 . . ?
 Cl1A C32 H32B 109.9 . . ?
 H32A C32 H32B 108.3 . . ?
 F1 P1 F1 180.0 . 2_767 ?
 F1 P1 F2 89.0(3) . . ?
 F1 P1 F2 91.0(3) 2_767 . ?
 F1 P1 F2 91.0(3) . 2_767 ?
 F1 P1 F2 89.0(3) 2_767 2_767 ?
 F1 P1 F3 91.3(4) 2_767 . ?
 F1 P1 F3 88.7(4) 2_767 2_767 ?
 F1 P1 F3 91.3(4) . 2_767 ?
 F1 P1 F3 88.7(4) . . ?
 F2 P1 F2 180.0(5) . 2_767 ?
 F3 P1 F2 91.4(4) 2_767 2_767 ?
 F3 P1 F2 91.4(4) . . ?
 F3 P1 F2 88.6(4) . 2_767 ?
 F3 P1 F2 88.6(4) 2_767 . ?
 F3 P1 F3 180.0 2_767 . ?

_shelx_SHELXL_version_number      '2014/7'
_olex2_submission_special_instructions 'No special instructions were received'
loop_
  _twin_individual_id
  _twin_individual_mass_fraction_refined
 1 0.941(4)
 2 0.059(4)
